# Supplementary material for: Dual-mode CRISPR/Cas12a-mediated alkaline phosphatase detection (CAD) biosensor
Source: Royal Society of Chemistry journal article supplement (doi:10.1039/d5ay01195g), 2026-01-01

**Supplementary File**

**Dual-Mode CRISPR/Cas12a-Mediated Alkaline  
Phosphatase Detection (CAD) Biosensor**

Daqi Chen<sup>1,2</sup>, Baian Zhu<sup>1</sup>, Yachunyue Zhou<sup>1</sup>, Zhezhi Fang<sup>1</sup>, Zhuobin Zhu<sup>1</sup>, Chaozhan Chen<sup>1\*</sup>, and Teng Shen<sup>1\*</sup>

1 School of Mechanical and Electrical Engineering, Guangzhou University, Guangzhou, Guangdong, China

2 State Key Laboratory of Industrial Control Technology, Zhejiang University, Zhejiang, China

\* Corresponding author: Chaozhan Chen and Teng Shen

Email: [chenchaozhan@gzhu.edu.cn](mailto:chenchaozhan@gzhu.edu.cn) & [shen215@gzhu.edu.cn](mailto:shen215@gzhu.edu.cn)

**Table S1.** All DNA and RNA sequences used in this work

| Note        | Sequence (5'-3')                                                                     |
|-------------|--------------------------------------------------------------------------------------|
| HPP         | CGTAC CCCTT TATGG ACACG GTTAT TGGCT GGGTC<br>TCCTG TACCT GGGGG GGGAG GTACA GGAGA C-P |
| crRNA       | UAAUU UCUAC UAAGU GUAGAU UGGAC ACGGU<br>UAUUG GCUGG                                  |
| FQ reporter | FAM-TTATT-BHQ1                                                                       |
| FB reporter | FAM-TTATT-Biotin                                                                     |

**Unprocessed gels of Fig. 2A**

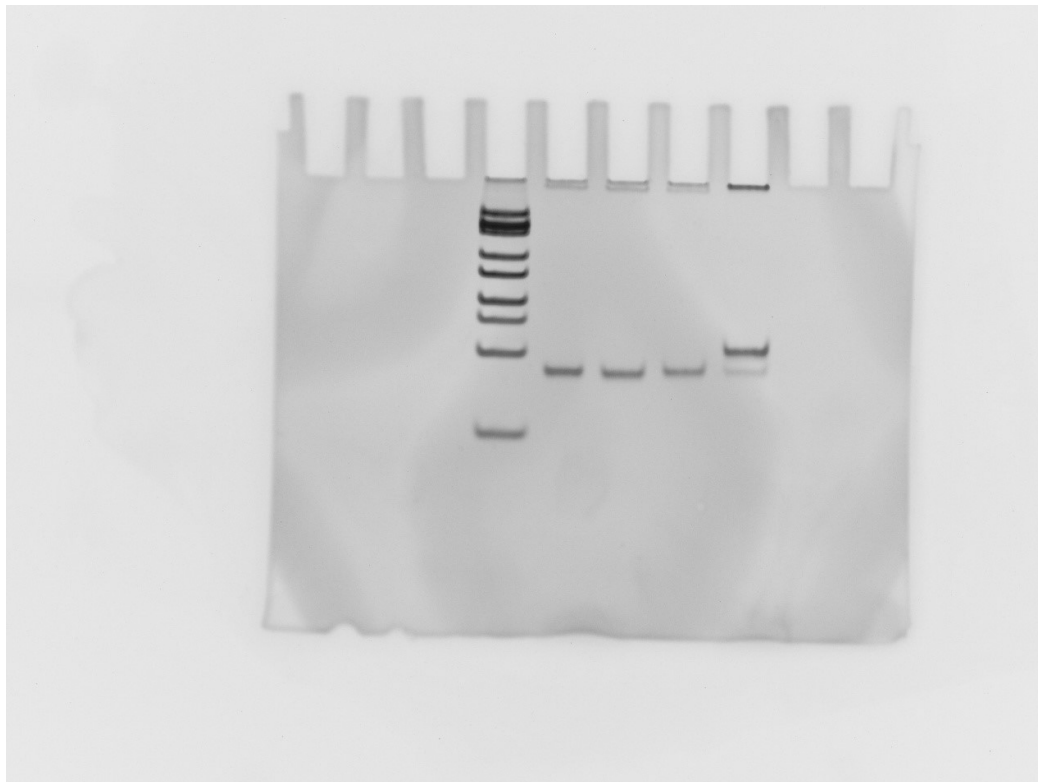

Supplement: d5ay01195g1.pdf [file d5ay01195g1.pdf]
